# Supplementary material
Source: Springer Nature journal article supplement (https://www.springermedizin.de/resource/supplementary/12882_2012_425_MOESM2_ESM.pdf/9454222)

□ unaffected male

○ unaffected female

◐ affected female (heterozygous)

■ affected male (hemizygous)

◻ deceased

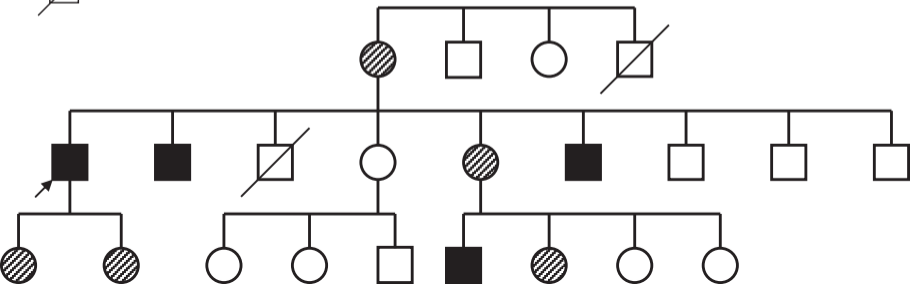

Supplement: MOESM2 [file 9454222]
